# Supplementary material for: Explicit analysis of functional group orientation in amorphous organic semiconductor films by using deuterated materials
Source: Royal Society of Chemistry journal article supplement (doi:10.1039/d2tc00562j), 2022-01-01
Supplement: d2tc00562j1.pdf [file d2tc00562j1.pdf]

## Supplementary Information

### Explicit analysis of functional-group orientation in amorphous organic semiconductor films by using deuterated materials

*Yoshihito Sukegawa, Yuro Yagi, Hideyoshi Kitahara, Shunji Mochizuki, Daisuke Yokoyama\**

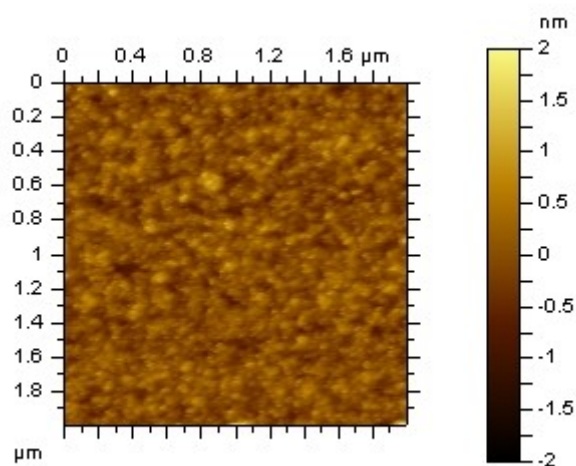

**Fig. S1** AFM image of a 100-nm-thick BPBPA-D0 film deposited on a Si(100) substrate. The RMS value of the surface roughness is 0.27 nm.

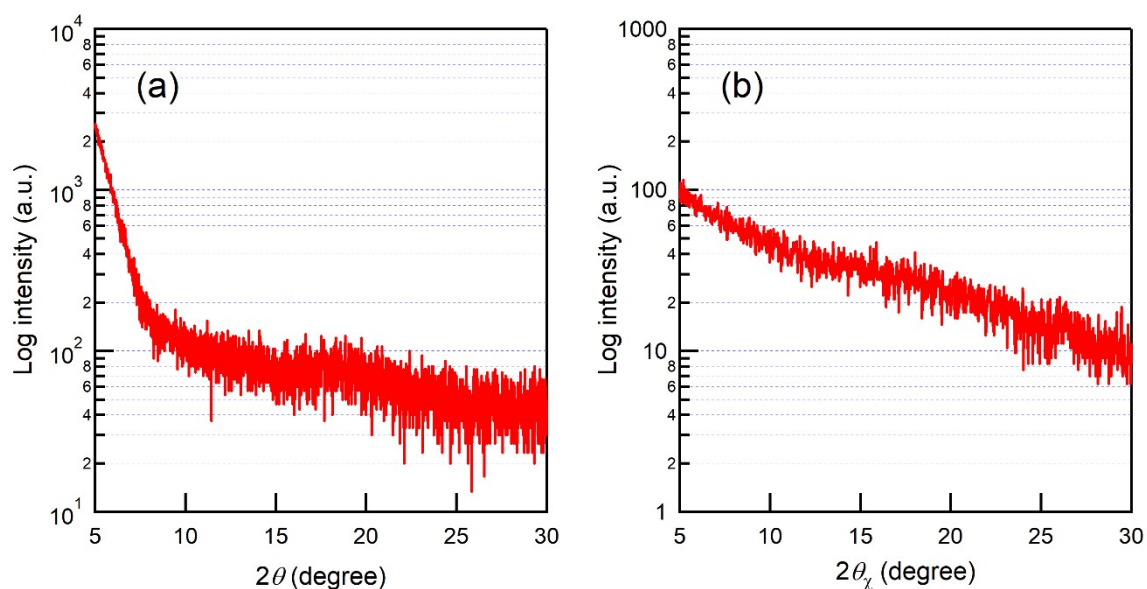

**Fig. S2** (a) Out-of-plane and (b) in-plane XRD patterns of a 100-nm-thick BPBPA-D0 film deposited on a Si(100) substrate.

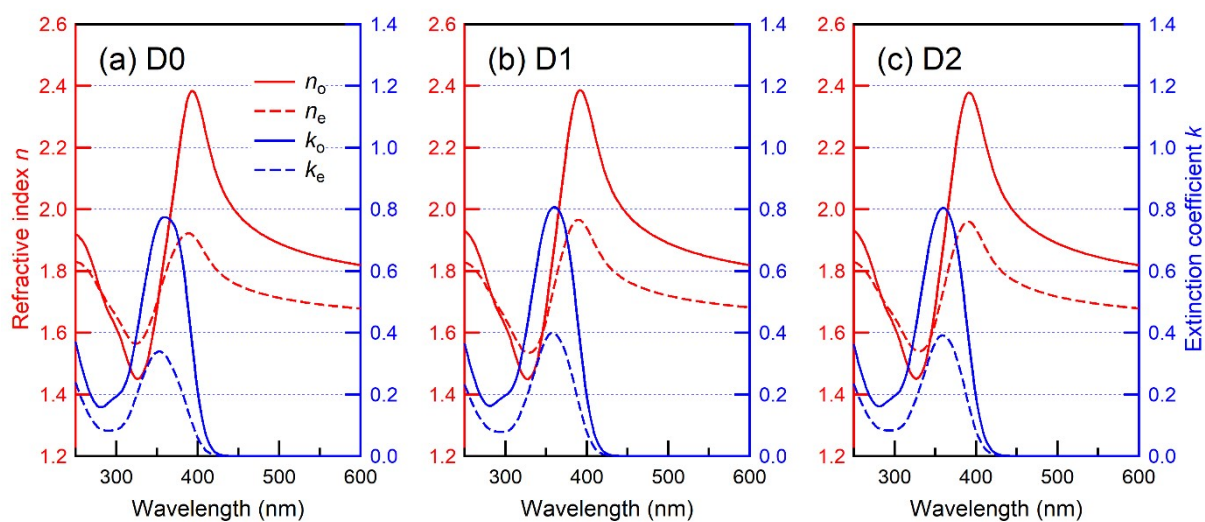

**Fig. S3** Anisotropic refractive indices and extinction coefficients of 100-nm-thick as-deposited films of (a) BPBPA-D0, (b) D1, and (c) D2 determined by VASE.

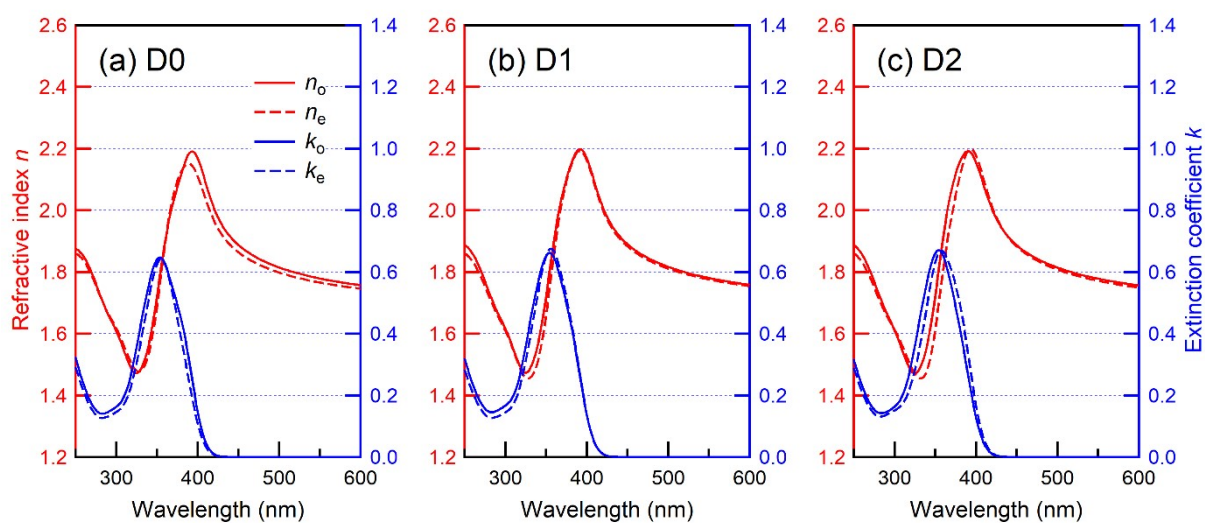

**Fig. S4** Anisotropic refractive indices and extinction coefficients of 100-nm-thick annealed films of (a) BPBPA-D0, (b) D1, and (c) D2 determined by VASE.

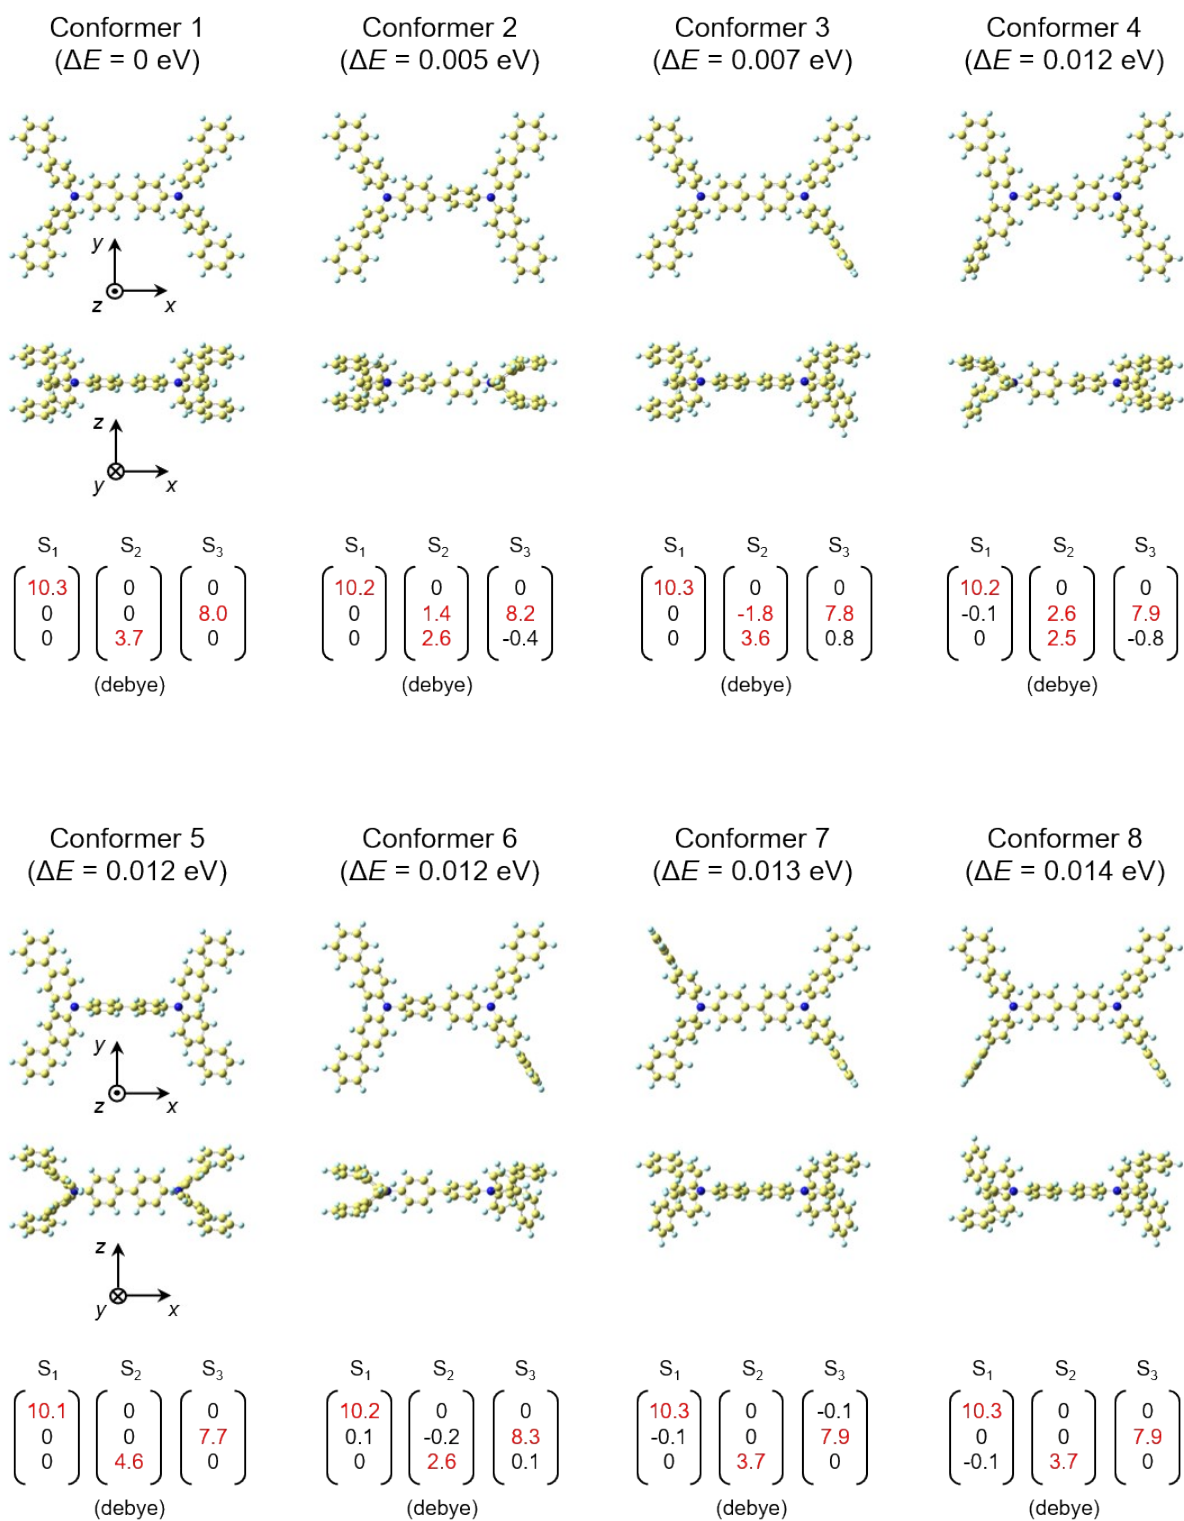

**Fig. S5** Steric structures and transition dipole moment vectors for low-energy electronic transitions of the 24 conformers of BPBPA molecules. The differences in the steric energy are also shown as  $\Delta E$ .

(Continued on next page)

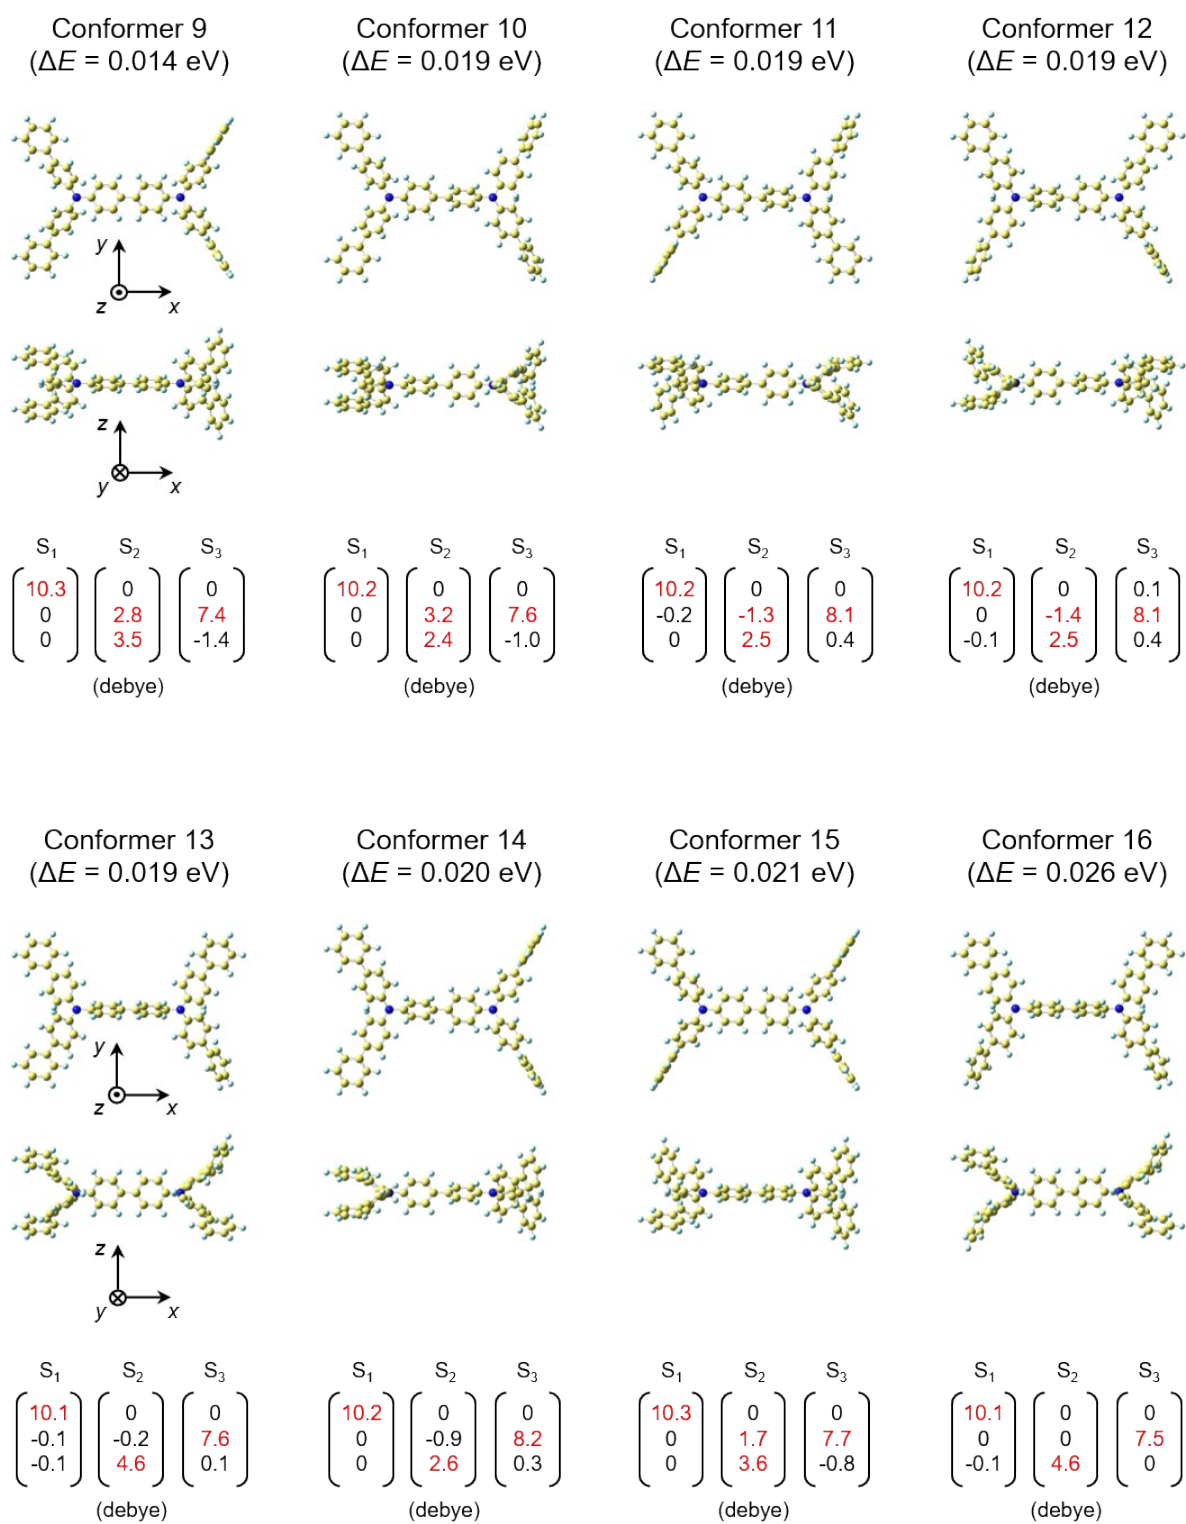

**Fig. S5**  
(Continued from the previous page)



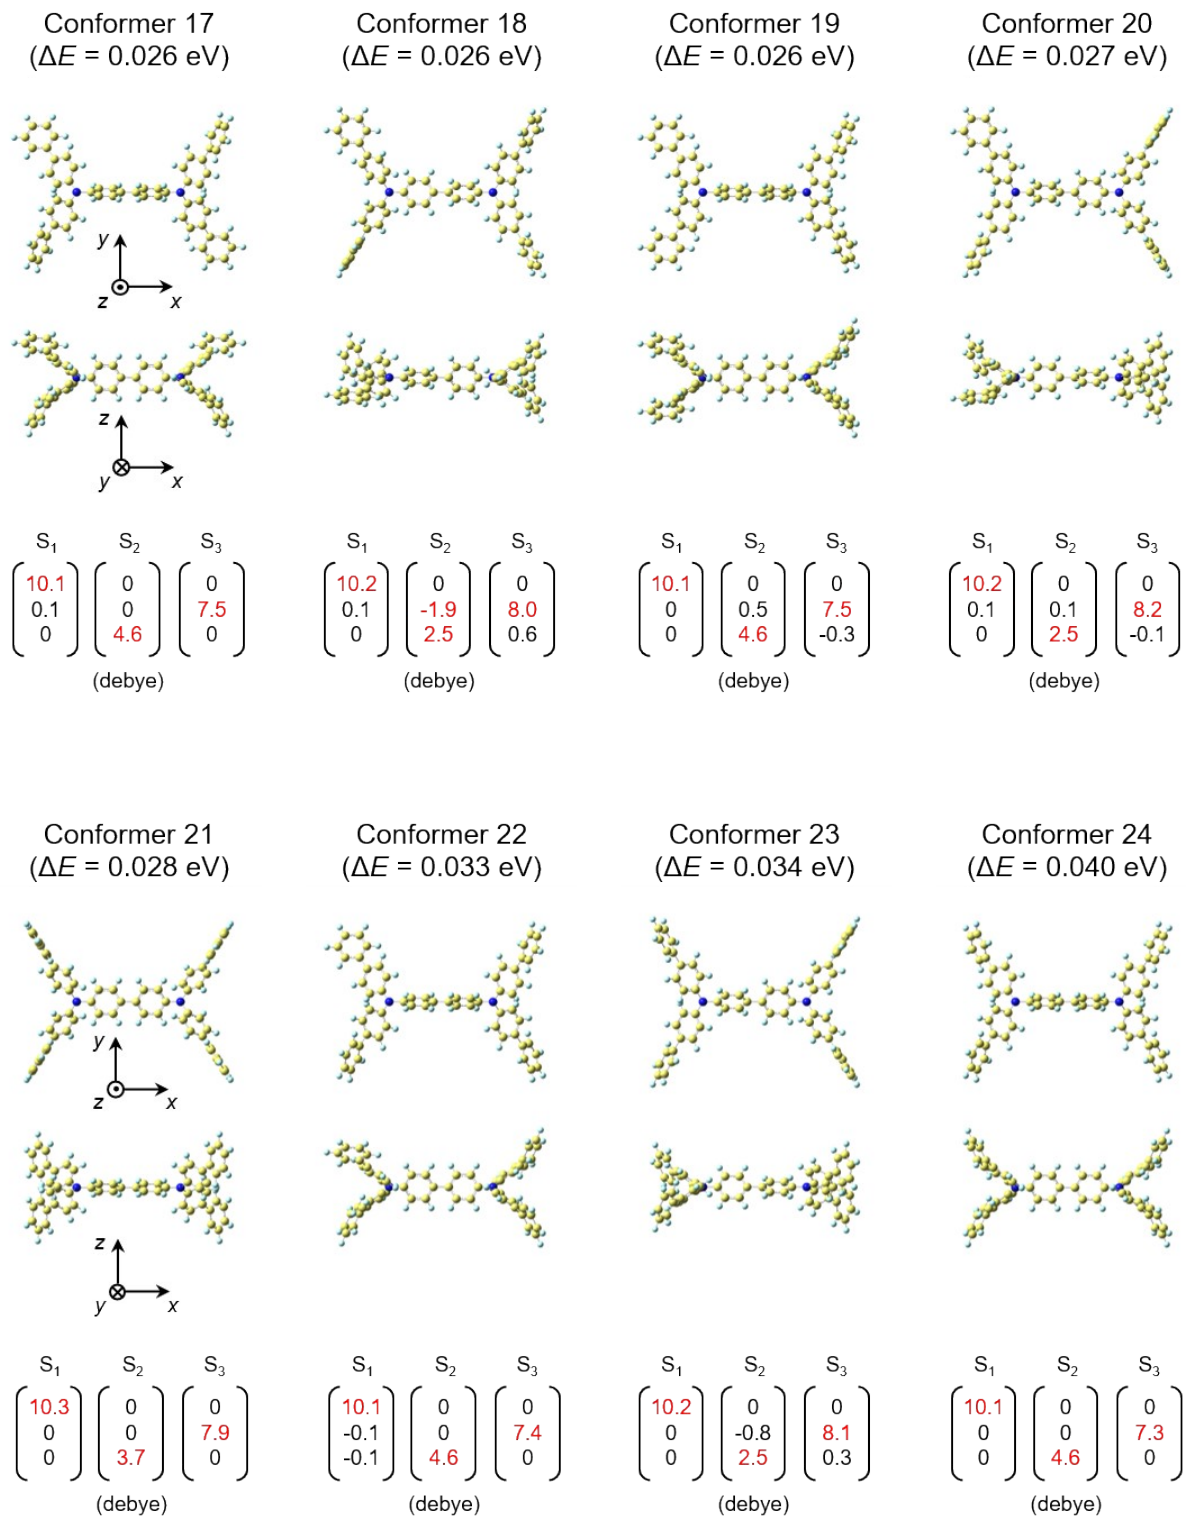

**Fig. S5**  
(Continued from the previous page)

(a) D0

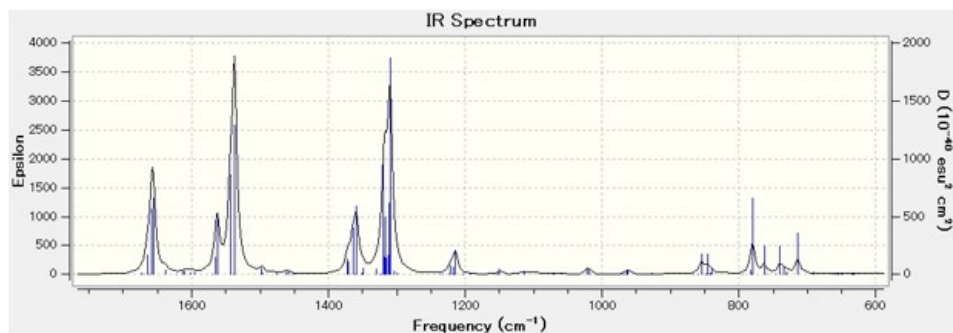

(b) D1

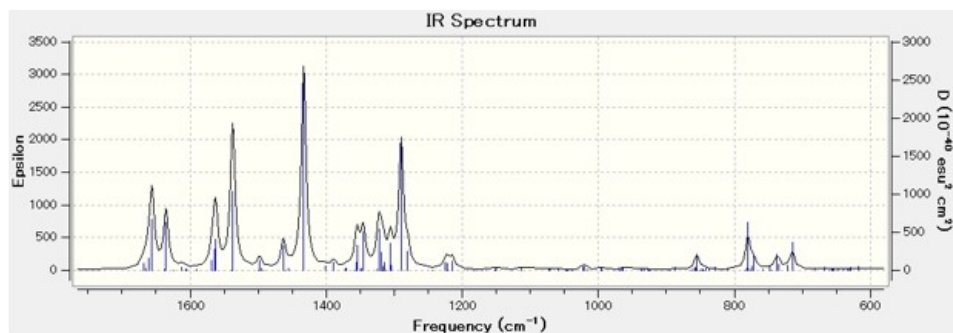

(c) D2

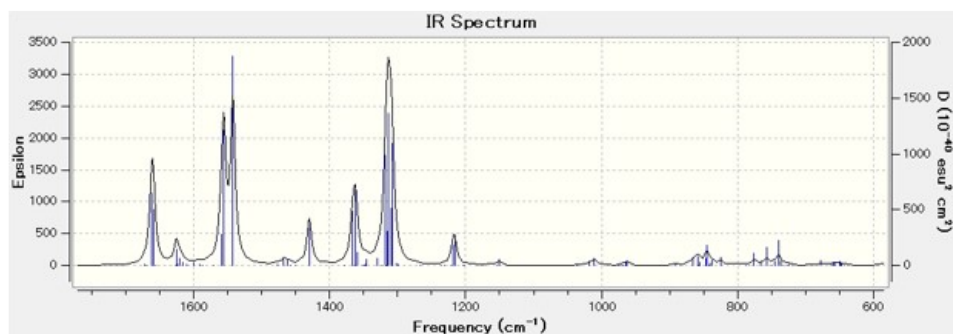

**Fig. S6** Simulated IR absorption spectra of (a) BPBPA-D0, (b) D1, and (c) D2 molecules obtained by DFT B3LYP/6-31G(d) calculations.

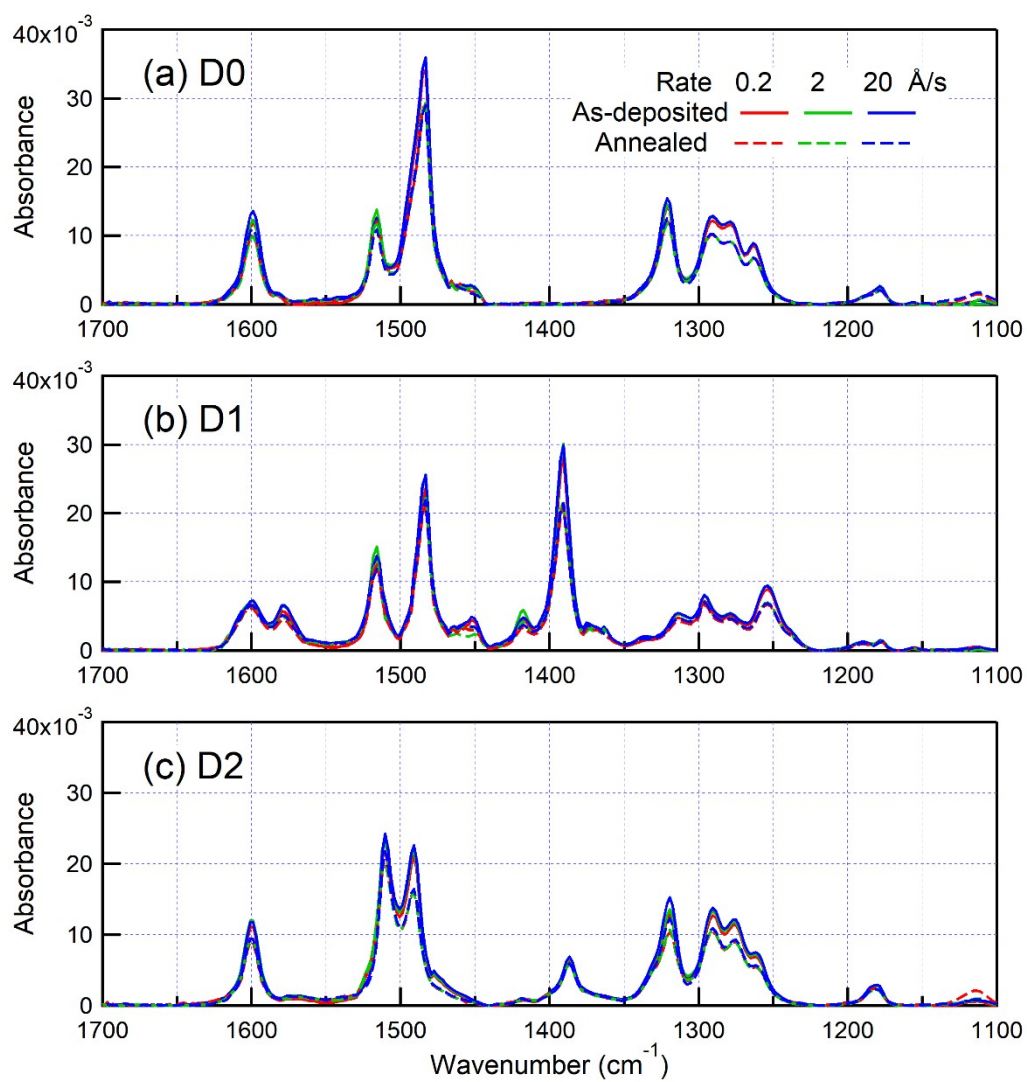

**Fig. S7** Dependence of IR absorption spectra of 100-nm-thick as-deposited and annealed (a) BPBPA-D0, (b) D1, and (c) D2 films on the deposition rate in the spectral range of 1100–1700  $\text{cm}^{-1}$ .

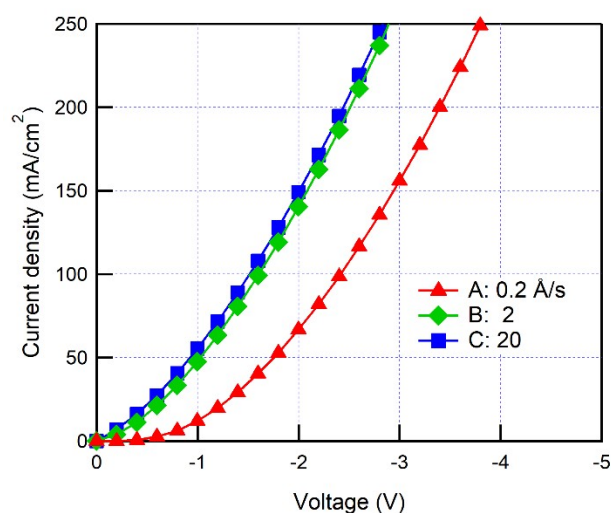

**Fig. S8**  $J$ - $V$  characteristics for negative voltage side of three hole-only devices A, B, and C, where BPBPA-D0 is deposited at three different deposition rates of 0.2, 2, and 20  $\text{\AA s}^{-1}$ , respectively; Device A, B, and C: glass/ITO (75 nm)/HAT-CN (5 nm)/BPBPA-D0 (100 nm at 0.2, 2, and 20  $\text{\AA s}^{-1}$ )/HAT-CN (5 nm)/Au (50 nm).

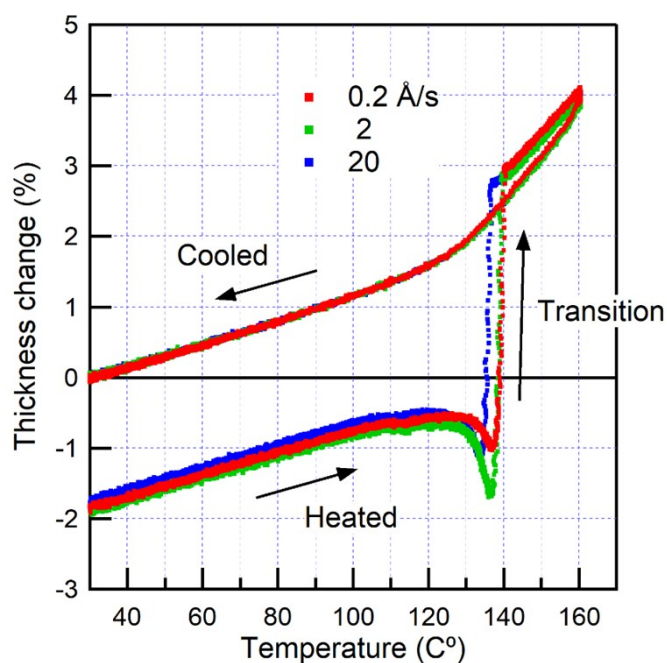

**Fig. S9** Thickness changes of as-deposited BPBPA-D0 films fabricated at deposition rates of 0.2, 2, and 20  $\text{\AA s}^{-1}$  determined by *in situ* ellipsometry during a heating-cooling cycle. To compare the relative film densities of the as-deposited films, the thicknesses at 30  $^{\circ}\text{C}$  after cooling were used as the standards for normalization. The thicknesses of the as-deposited films are  $\sim 2\%$  smaller than those of the films after cooling, but there was not a substantial difference ( $<0.1\%$ ) in the thickness of the as-deposited films fabricated at the different deposition rates.



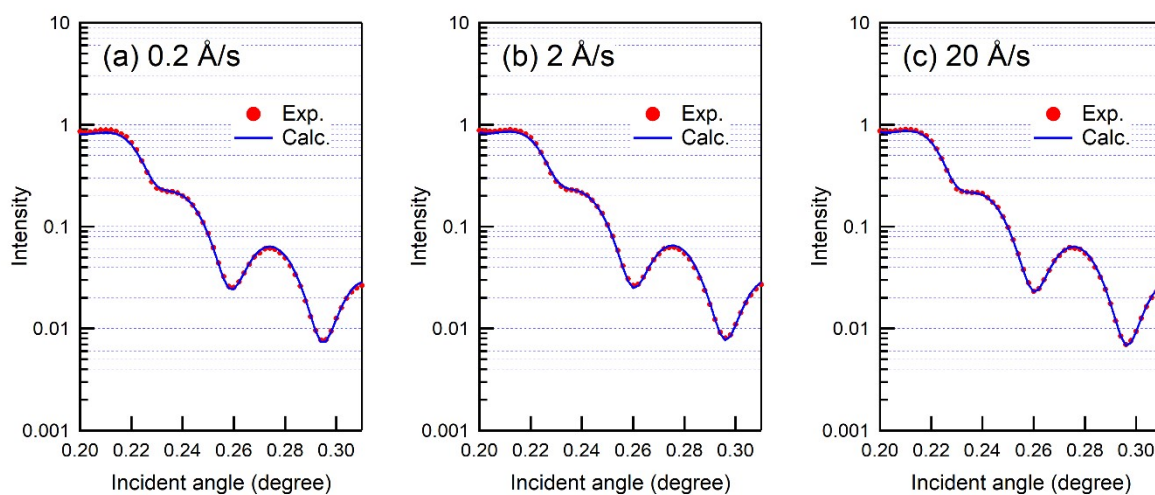

**Fig. S10** XRR patterns of BPBPA-D0 films deposited on a Si(100) substrate at deposition rates of (a) 0.2, (b) 2, and (c) 20 Å s<sup>-1</sup>. The analytical results of the thickness and film density are (a) 98.6 nm and 1.135 g/cm<sup>3</sup>, (b) 98.7 nm and 1.133 g/cm<sup>3</sup>, and (c) 97.9 nm and 1.138 g cm<sup>-3</sup>.

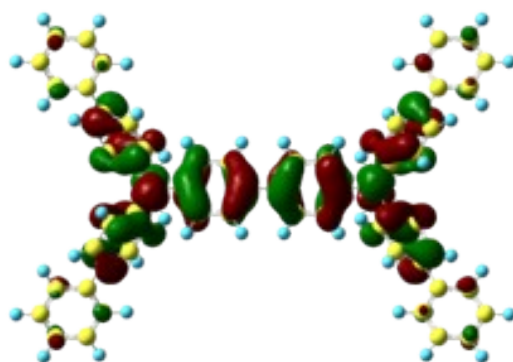

**Fig. S11** Distribution of the HOMO of the BPBPA molecule obtained by DFT B3LYP/6-31G(d) calculation.

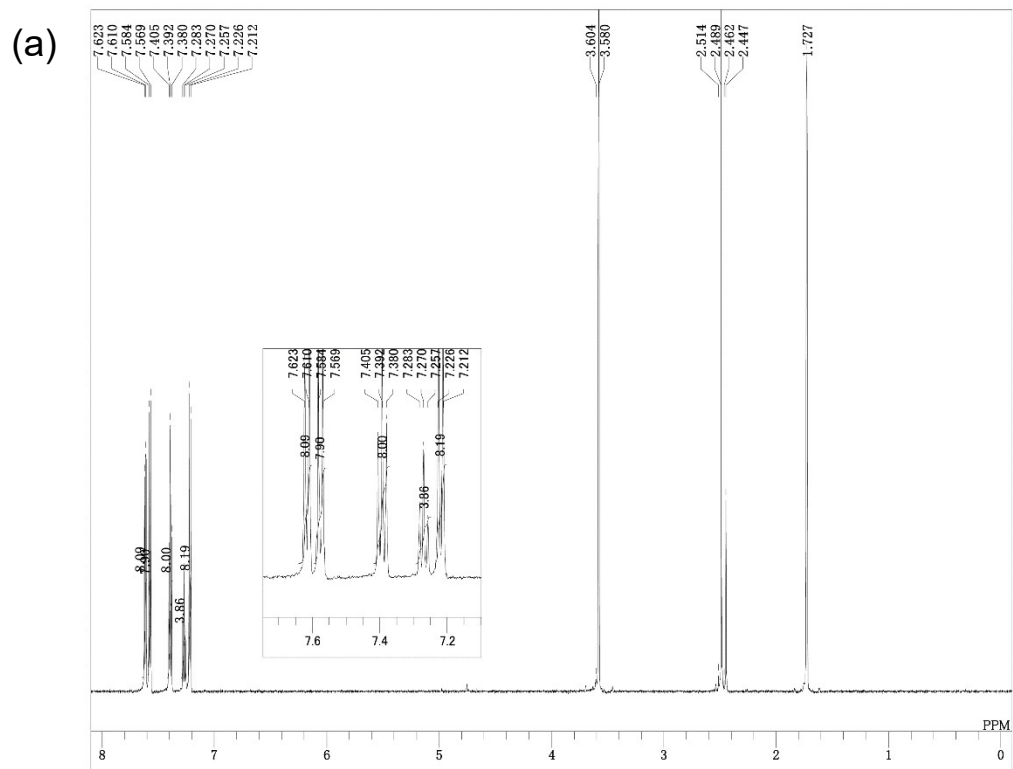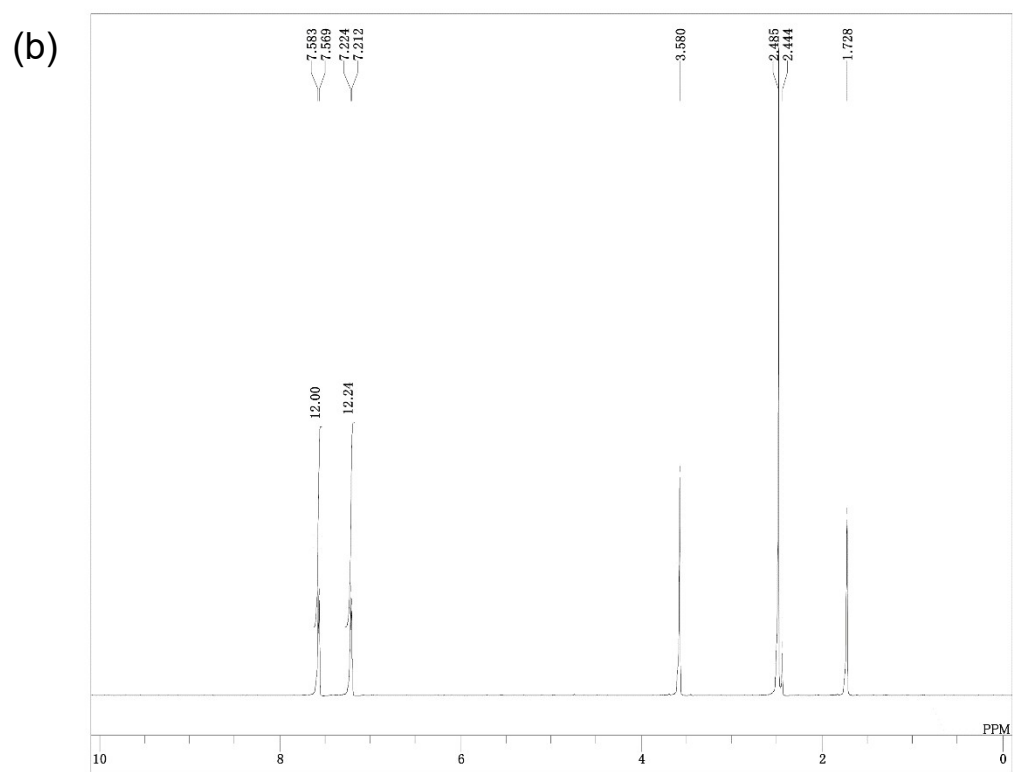

Fig. S12  $^1\text{H}$ -NMR spectra of (a) BPBPA-D1 and (b) D2.
